# Supplementary material for: The relationship between the severity and complications of Henöch-Schönlein purpura in children and dietary inflammatory index: a retrospective cohort study
Source: PeerJ. 2024 Sep 24;12:e18175. doi: 10.7717/peerj.18175 (PMC11430262; doi:10.7717/peerj.18175)
Supplement: Supplemental Information 1 [file peerj-12-18175-s001.xlsx]

## Sheet: Anti-inflammatory dietary group
No	Age (years)	Body mass index (kg/m2)	Gender (Male/Female)	Disease duration (months)	Allergic Purpura Family History (Y/N)	Physical Activity (hrs/week)	Mode of Delivery	C-reactive protein (mg/L)	Tumor necrosis factor-α (pg/mL)	Interleukin-6 (pg/mL)	Erythrocyte sedimentation rate (mm/h)	White blood cell count (109/L)	Eosinophils (%)	IgE (IU/mL)	Total calories (kcal/day)	Protein (g/day)	Carbohydrates (g/day)	Fat (g/day)	Fiber (g/day)	Total cholesterol	LDL cholesterol	HDL cholesterol	Triglycerides	VLDL cholesterol	Renal complications	Skin complications	Gastrointestinal complications	Coagulation disorders	Respiratory complications	Neurological complications	Disease Severity
1	8.6	20.45	0	31.16	0	5.06	1	6.4	12.49	4.88	21.64	1.73	3.98	217.8	1986.24	48.28	282.41	70.85	20.72	190.35	114.3	34.28	128.78	20.41	0	0	1	0	0	0	1
2	7.6	18.88	0	17.31	0	4.17	1	3.81	12.94	7.43	15.87	3.86	4.32	291.9	1550.43	39.16	285.85	76.99	24.37	184.84	89.96	59.59	115.62	25.1	0	0	0	0	0	0	1
3	8.96	18.08	1	18.41	0	1.76	0	1.72	8.94	8.3	11.52	9.91	4.82	242.78	1662.58	63.98	238.61	44.82	11.05	191.93	103.23	42.16	104.5	25.97	0	0	0	0	0	0	1
4	8.02	16.56	1	22.27	0	3.12	0	7.32	15.79	3.12	14.13	8.93	5.3	246.09	1780.22	85.37	265.37	97.83	29.73	161.89	98.9	38.5	91.08	25.7	0	0	0	0	1	0	2
5	7.68	13.63	1	31.4	0	2.97	0	1.17	10.84	11.59	17.24	5.78	1.75	248.52	1968.43	56.53	208.34	65.4	20.22	154.97	106.32	41.49	139.25	19.54	0	0	1	0	0	0	1
6	11.03	17.17	1	17.99	0	4.61	1	3.08	12.51	6.54	15.38	7.52	4.56	291.62	2179.23	51.15	229.53	59.22	18.72	180.94	114.7	33.56	101.61	18.6	0	0	0	0	0	0	1
7	8.23	15.39	0	9.57	1	3.54	1	3.71	20.58	3.23	12.68	9.43	4.97	211.76	1978.53	73.32	256.14	77.86	26.8	197.1	117.35	52.11	115.42	22.55	1	1	0	0	0	0	1
8	8.54	20.74	0	14.32	0	2.37	0	1.2	9.99	8.65	15.02	11.55	4.3	242.54	1742.96	53.7	235.03	82.47	31.5	187.21	88.49	53.43	125.3	12.26	0	0	0	0	0	0	3
9	10.48	17.84	0	9.31	0	4.24	0	5.67	18.35	0.22	10.84	7.47	2.49	155.97	2181.33	83.85	264.21	98.99	26.55	187.12	96.99	63.2	112.5	25.36	0	1	0	0	0	0	1
10	5.62	21.19	0	9.13	0	3.32	0	5.37	13.6	6.21	12.71	6.71	3.65	260.09	1966.77	52.54	301.93	104	23.56	124.58	101.28	45.77	117.5	19.49	0	0	0	1	0	0	3
11	11.52	19.46	0	1.21	1	2.89	1	0.54	8.64	5.65	19.1	9.12	3.77	187.96	2001.75	50.47	273.07	99.82	22.81	185.76	85.51	55.1	126.6	21.22	0	0	0	0	0	0	2
12	7.8	18.99	1	15.24	0	3.34	0	1.42	16.84	15.08	7.23	6.5	2.2	204.47	1719.88	53.36	243.07	93.8	24.71	154.9	92.38	43.19	83.26	25.01	0	0	0	0	1	0	3
13	7.58	16.3	0	17.84	0	4.39	1	3.73	11.62	9.45	16.94	9.5	3.33	248.77	1658.63	64.96	198.74	75.66	22.63	168.14	90.73	53.13	90.2	24.74	0	0	0	0	0	0	2
14	6.75	19.98	1	9.45	0	1.67	1	2.86	15.6	9.2	21.71	9.76	6.02	237.89	2026.4	51.62	246.17	40.86	32.97	183.9	131.31	38.2	138.13	27.78	0	0	0	0	0	0	2
15	7.68	15.79	1	11.67	1	2.5	1	3.8	12.58	14.02	21.73	8.93	4.19	179.8	1642.39	52.51	264.02	60.73	23.59	161.52	103.97	40.15	134.13	20.1	0	0	0	0	0	0	1
16	8.35	18	0	15.92	0	2.62	1	3.8	13.35	4.48	13.58	2.25	4.38	135.87	1907.24	70.2	227.73	71.16	25.05	184.71	108.97	50.38	122.99	17.73	0	0	0	0	0	0	2
17	7.25	13.77	1	11.05	0	3.87	1	1.67	13.8	2.51	15.44	4.27	4.64	223.47	1624.14	71.88	191.45	85.36	25.43	166.35	124.48	49.9	125.63	18.78	0	0	0	0	0	0	1
18	10.28	17.11	1	10.73	0	4.14	0	0.68	8.98	5.08	13.85	7.36	2.38	293.76	1748.07	54.79	207.23	79.44	26.92	158	89.98	46.98	125.51	25.47	0	0	0	0	0	0	1
19	6.63	19.82	1	4.74	0	4.44	0	5.86	6.62	10.22	13.42	5.77	2.13	208.58	1290.11	60.73	249.53	75.58	24.56	145.19	121.12	63.76	122.21	22.43	1	0	0	0	0	1	3
20	7.46	15.64	1	6.2	1	3.76	1	1.89	13.06	13.21	22.02	11.36	3.98	196.7	1934.62	50.58	223.81	60.51	37.69	170.24	80.66	47.86	109.77	23.84	1	0	0	0	0	0	2
21	8	19.1	0	21.03	0	4.59	0	4.88	18.01	10.39	3.9	8.46	3.03	161.03	1623.46	66.09	212.87	102.59	34.09	175.6	102.42	35.03	109.07	23.73	1	0	1	0	0	0	1
22	7.91	16.69	0	16.33	1	3.33	0	3.24	11.18	11.44	15.68	8.62	3.83	244.9	1802.69	54.42	215.13	50.49	24.21	146.14	125.54	54.18	133	22.43	0	0	0	0	0	0	2
23	6.61	17.72	1	21.88	0	4.84	0	3.52	12.37	8.2	13.68	9.42	5.3	222.41	1903.95	84.33	210.81	78.71	31.17	157.72	94.45	34.6	138.95	26.47	0	0	0	0	0	0	1
24	8.29	19.28	1	4.73	1	3.78	1	5.57	14.2	7.84	13.02	8.34	4.77	304.21	1559.68	64.59	245.13	46.36	30.38	206.14	109.5	33.41	144.51	26.37	0	0	0	0	0	1	1
25	9.2	20.49	1	9.82	1	4.91	1	2.6	19.49	7.84	18.33	6.88	2.4	226.67	1765.17	46.63	298.46	82.56	18.28	185.29	144.84	23.6	92.91	19.88	0	0	0	0	0	0	2
26	7.68	18.33	1	16.11	0	3.58	1	3.71	19.57	10.61	16.04	6.74	5.66	193.93	1551.28	33.78	226.09	73.58	28.67	170.69	120.62	43.43	96.06	23.52	0	0	0	0	0	0	2
27	12.57	14.99	1	19.31	0	1.7	0	3.63	11.27	8.01	21.38	7.23	2.46	201.13	1736.43	82.57	264.67	70.73	17.34	144.64	104.01	38.55	119.08	20.32	0	0	0	0	0	0	2
28	10.79	20.64	1	23.8	1	3.82	0	2.7	14.03	9.85	10.69	5.69	2.07	279.46	1968.06	52.35	252.8	67.2	33.06	155.48	104.54	33.9	114.38	31.13	0	0	0	0	0	0	1
29	8.97	15.16	0	7.55	0	3.66	1	5.51	12.66	8.54	21.07	5.3	4.91	237.63	1593.04	66.11	256.67	54.21	24.78	204.7	122.67	38.69	125.31	21.09	0	0	0	1	0	0	1
30	8.41	16.81	1	18.01	1	4.73	1	2.44	16.63	7.05	3.5	6.43	3.19	353.93	1716.69	79.6	286.71	40.04	26.39	195.31	111.82	48.41	104.24	25.27	0	1	0	0	0	0	1
31	7.96	17.73	1	19.8	1	5.3	0	2.31	12.79	4.51	12.79	9.74	4.09	269.47	1873.28	52.93	237.55	83.86	19.37	136.77	85.96	30.53	110.07	22.15	0	0	0	0	0	0	2
32	7.19	17.49	0	20.77	1	4.98	0	2.52	11.79	9.33	16.23	6.1	4.38	201.04	1466.82	68.59	243.73	78.74	35.24	188.05	101.64	36.67	130.86	19.74	0	0	0	1	0	0	2
33	5.31	15.22	1	21.06	0	2.55	0	5.36	13.63	7.98	15.72	4.45	4.83	215.22	1706.14	41.8	242.68	63.24	21.66	169.76	123.43	45.99	123.67	22.71	0	0	0	0	0	0	2
34	9.06	16.07	0	11.37	1	3.19	1	1.16	14.73	6.03	19.01	4.88	4.44	334.54	1911.07	77.06	191.31	83.33	30.41	151.99	125.46	33.8	115.98	20.25	0	0	0	0	0	1	1
35	10.12	15.55	1	10.13	0	4.62	0	5.41	12.88	8.82	18.01	5.55	6.11	213.55	1990.44	56.32	322.23	57.44	25.33	198.47	146.74	39.49	130.51	20.42	0	0	0	0	0	0	1
36	8.17	18.86	1	19.19	1	3.48	1	2.18	14.97	7.21	24.44	3.01	4.85	242.3	1513.65	72.81	234.76	73.95	23.74	170.66	95.72	33.79	130.88	23.69	0	0	0	0	0	0	1
37	9.73	16.57	0	30.85	0	2.92	1	3.15	9.54	3.4	14.33	4.81	5.54	295.55	1519.26	53.59	253.44	81.91	25.18	181.51	77.96	36.5	110.56	24.3	0	0	0	0	0	0	1
38	6.66	15.19	0	22.11	0	3.39	0	3.98	7.79	3.09	10.56	4.08	4.78	218.14	1928.99	68.97	207.69	59.47	30.77	160.71	109.44	44.2	118.1	21.59	0	0	0	0	0	0	3
39	10.14	17.24	1	19.89	0	1.08	1	1.72	19	7.25	17.28	10.58	3.84	277.44	1834.6	57.83	241.71	78.17	27.8	182.94	129.44	45.1	128.69	15.01	0	0	0	0	0	0	3
40	7.58	19.87	0	20.93	0	5.04	1	4.01	16.06	7.63	17.1	7.59	4.93	244.3	1646.54	64.64	183.5	62.18	31.47	147.02	111.57	49.14	95.53	21.13	0	0	0	0	0	0	3
41	8.7	16.36	0	8.77	0	2.15	0	2.56	11.67	7.34	13.5	9.43	5.12	251.42	1507.38	49.88	286.64	54.54	23.89	178.72	85.44	36.81	131.92	28.21	0	1	0	0	0	0	1
42	6.1	21.62	0	13.01	0	3.95	0	1.49	9.26	7.71	19.92	6.61	3.54	264.89	1636.58	62.43	246.45	61.09	26.41	175	87.33	47.26	121.14	22.79	0	0	0	0	0	0	2
43	9.7	18.77	0	8.83	0	5.65	0	3.53	9.87	7.65	16.51	7.59	3.68	227.01	1883.81	69.43	249.82	85.59	27.95	161.69	109.01	44.24	108.76	27.11	0	0	0	0	0	0	1
44	9.45	19.34	0	27.04	0	3.19	0	2.26	6.08	10.03	17.58	4.52	3.98	210.83	1522.4	54.51	233.5	41.07	30.31	207.46	104.23	44.73	114.98	22.52	0	1	0	0	0	1	1
45	8.28	21.13	0	11.51	0	2.89	0	1.98	8.8	7.11	17.78	8.19	2.84	259.2	1917.39	48.86	237.53	67.97	21.76	217.14	87.05	43.85	82.08	22.02	0	1	0	0	0	0	3
46	8.8	18.51	1	21.19	1	2.8	1	0.96	15.35	7.3	16.39	8.53	5.38	316.69	1899.97	60.01	224.4	79.32	33.77	168.04	102.73	40.41	134.65	24.96	0	0	0	0	0	0	2
47	9.01	21.04	1	14.82	1	3.13	0	4.32	12.23	6.65	22.91	8.17	4.26	199.86	1711.34	50.12	260.01	78.57	16.46	128.3	105.87	52.49	110.72	25.26	0	0	0	1	0	0	1
48	9.73	18.09	1	17.11	1	4.12	1	2.08	7.25	10.08	9	7.09	6.42	217.46	1646.37	58.24	240.19	72.6	33.24	192.29	89.57	46.4	124.92	24.08	0	0	0	0	0	0	3
49	10.48	18.26	0	13.13	0	3.65	0	3.78	0.92	7.73	11.99	9.09	5.39	286.99	1839.18	61.14	229.73	66.43	22.51	184.69	122.35	47.71	112.99	25.59	0	0	0	1	0	0	1
50	10.16	17.61	1	3.33	0	3.15	1	2.36	13.17	9.42	22.64	9.98	1.78	226.28	1597.27	72.39	232.55	77.84	18.2	157.83	113.18	45.48	128.57	26.76	0	0	0	0	0	0	1
51	8.74	21.93	0	18.23	0	4.43	1	4.12	14.15	7.66	14.16	7.26	4.39	265.38	1585.7	85.58	332.79	78.44	13.62	179.81	107.9	47.26	121.17	25.68	0	0	0	0	0	0	3
52	11.33	19.5	1	8.4	0	3.02	0	2.35	14.5	6.48	6.71	6.14	7.01	279.13	1221.37	44.51	209.44	80.74	20.91	187.76	108.01	16.37	119.39	17.92	0	0	0	0	0	0	2
53	10.35	16.13	0	11.12	0	2.66	1	2.74	6.26	9.05	17.34	5.97	3.98	224.22	1516.75	66.82	233.59	52.41	32.3	130.88	89.57	31.92	113.08	19.92	0	0	0	0	0	0	3
54	6.99	17.69	1	13.71	1	1.06	0	3.28	17.11	11.42	11.13	7.44	5.34	128.38	1770.85	65.38	234.94	75.07	13.59	160.37	99.35	44.86	146.1	19.3	0	0	0	0	0	0	1
55	9.43	16.58	0	20.23	0	3.84	1	2.68	9.32	8.99	11.96	4.66	4.6	247.49	1861.19	77.26	199.5	95.26	28.81	202.95	125.27	42.72	104.57	23.45	0	0	0	0	1	0	2
56	9.27	20.47	1	12.73	1	2.89	0	3.96	12.38	6.24	16.05	9.67	2.24	191.11	1902.12	63.32	243.24	80.04	32.68	155.55	98.07	42.2	149.74	30.98	0	0	0	0	0	0	1

## Sheet: Pro-inflammatory dietary group
No	Age (years)	Body mass index (kg/m2)	Gender (Male/Female)	Disease duration (months)	Allergic Purpura Family History (Y/N)	Physical Activity (hrs/week)	Mode of Delivery	C-reactive protein (mg/L)	Tumor necrosis factor-α (pg/mL)	Interleukin-6 (pg/mL)	Erythrocyte sedimentation rate (mm/h)	White blood cell count (109/L)	Eosinophils (%)	IgE (IU/mL)	Total calories (kcal/day)	Protein (g/day)	Carbohydrates (g/day)	Fat (g/day)	Fiber (g/day)	Total cholesterol	LDL cholesterol	HDL cholesterol	Triglycerides	VLDL cholesterol	Renal complications	Skin complications	Gastrointestinal complications	Coagulation disorders	Respiratory complications	Neurological complications	Disease Severity
1	7.01	19.01	0	24.03	0	3.37	1	4.19	17.23	13.41	12.48	14.67	4.31	379.37	1703.99	55.73	242.08	57.34	34.49	215.14	103.53	46.48	130.97	29.59	0	1	0	0	1	0	1
2	6.87	17.03	0	11.7	0	4.12	1	8.22	10.38	10.38	19.29	10.74	4.65	387.7	1966.93	78.33	279.71	69.98	38.83	194.36	156.68	49.67	113.51	24.6	0	0	0	0	0	0	3
3	5.7	16.28	0	1.88	1	3.55	1	3.82	15.12	10.54	18.98	6.71	2.41	222.54	2037.14	66.06	274.22	72.09	29.43	199.09	121.72	54.55	99.43	29.88	0	0	1	0	0	0	1
4	8.04	17.81	1	10.14	1	3.58	0	5.08	15.82	10.58	13.22	11.16	7.65	383.95	2225.26	43.59	283.66	58.65	32.28	207.19	87.19	35.23	113.52	30.44	1	0	0	1	1	0	2
5	7.96	19.56	0	10.1	0	2.33	0	4.94	13.51	8.93	21.35	9.35	5.38	321.98	2070.33	61.67	294.57	65.61	25.8	215.05	147.4	26.77	99.99	22.58	0	0	0	1	0	0	2
6	8.81	15.57	0	15.71	0	3.85	0	4.24	13.28	11.05	18.95	9.17	6.32	375.03	2020.72	97.13	295.71	94.04	30.87	151.31	91.58	39.95	108.65	28.85	1	1	0	1	0	0	3
7	10.26	17.11	1	14.86	0	2.8	0	4.2	8.81	12.1	24.46	4.64	3.52	340.55	1955.74	65.32	349.84	40.18	27.91	174.75	123.69	70.64	121.43	30.74	0	0	0	0	0	1	3
8	8.44	20.54	1	1.75	0	1.4	0	6.26	17.8	11.3	16.07	8.2	5.55	224.89	1808.04	78.16	259.41	107.75	26.64	227.03	134.07	48.46	112.49	25.01	0	1	0	0	0	0	3
9	11.98	16.22	0	13.95	1	4.57	1	5.11	19.17	0.38	20.21	6.01	5.65	375.35	1867.54	92.8	326.63	97.78	32.14	234.82	121.15	43.94	127.29	26.11	0	0	1	1	0	0	2
10	9.27	19.31	1	17.66	0	2.08	0	1.65	21.03	9.69	19.47	12.8	5.7	372.34	1603.48	73.5	229.28	42.4	25.42	190.32	149.36	69.7	110.13	28.77	0	0	0	0	0	1	2
11	8.31	17.85	1	18.36	1	4.86	0	7.55	17.2	12.84	15.59	11.71	6.77	280.69	1720.13	90.05	226.5	76.66	30.85	257.23	157.66	57.54	121.23	25.47	0	0	0	0	1	0	3
12	8.05	19.07	0	12.61	0	1.68	0	0.69	21.2	6.99	18.68	9.89	5.56	311.15	1467.54	71.81	235.05	88.67	27.15	200.78	129.54	34.57	117.45	27.92	1	0	0	1	0	0	3
13	8.2	19.28	1	10.02	1	2.58	0	6.91	20.77	4.19	7.78	8.83	1.44	281.43	2259.64	73.92	277.56	93.14	22.23	177.01	145.67	50.67	112.9	27.97	0	1	0	0	0	1	1
14	9.69	19.42	1	33.29	0	3.43	1	10.47	9.8	6.8	24.5	8.57	4.75	337.16	1794.03	55.13	263.28	49.3	36.44	196.06	91.83	34.18	132.11	26.42	0	0	0	1	0	0	1
15	7.17	15.3	0	22.6	1	2.09	0	6.73	17.76	9.83	15.48	6.46	6.14	315.42	2167.97	80.38	215.21	82.25	40.6	242.75	124.32	50.23	130.21	27.19	1	0	0	0	1	0	3
16	8.9	16.95	1	9.81	0	3.73	1	4.03	16.36	11.68	25.8	7.99	3.85	306.51	2194.96	62.66	294.42	70.52	24.77	187.72	111.18	50.41	116.99	27.04	1	0	1	0	0	0	1
17	9.55	13.91	0	16.62	0	3.36	1	8.14	17.11	10.95	6.13	8.13	5.14	233.5	1971.94	51.42	303.62	87.51	28.38	179.07	136.97	62.57	135.68	17.2	1	0	0	0	0	1	3
18	9.15	18.99	0	9.26	0	2.64	1	3.86	9.24	8.68	19.07	11.65	4.67	307.38	1981.33	68.04	233.81	62.39	29.36	206.44	124.41	52.73	137.85	27.8	0	0	0	0	0	1	3
19	10.26	16.57	1	1.77	1	2.95	0	5.06	10.21	6.16	20.97	5.91	4.46	345.55	1814.86	67.25	206.01	82.73	34.68	212.86	138.48	53.62	152.15	26.08	0	0	0	1	0	0	3
20	7.4	19.17	0	23.3	0	4.1	1	2.99	10.95	13.87	16.88	9.43	6.26	443.41	1721.74	57.51	265.93	90.99	27.68	202.98	189.73	59.97	138.96	28.23	0	0	1	0	0	0	3
21	9.81	16.73	1	28.43	1	2.65	1	4.12	24.37	5.24	19.02	10.66	5.42	214.29	1449.37	70.51	226.82	92.44	24.06	211.54	95.33	55.66	122.78	29.8	0	0	0	1	0	0	2
22	10.73	20.4	1	22.9	0	3.72	0	6.07	20.92	9.77	18.87	9.61	3.38	285.43	1820.43	72.23	285.98	103.31	28.72	194.79	141.32	39.18	128.12	22.09	1	0	0	1	0	0	1
23	8.84	20	1	26.82	0	4.21	0	1.65	16.83	9.07	17.26	8.64	6.91	261.82	1863.95	80.09	283.49	47.35	33.97	182.27	109.72	62.24	136.98	27.82	0	1	1	0	1	1	1
24	6.22	15.04	1	6.82	0	1.32	1	2.79	9.19	10.81	18.22	6.93	6.68	272.92	1957.54	83.76	297.68	70.56	31.68	158.78	106.58	51.49	150.14	32.42	0	1	0	0	1	1	2
25	8.46	18.27	0	24.93	1	2.12	0	6.17	9.68	11.64	26.97	6.72	6.66	244.72	1992.5	62.91	258.44	99.4	32.25	192.56	114.45	45.68	117.92	29.02	1	0	0	0	0	0	3
26	9.43	18.64	1	11.5	0	5.71	0	7.08	16.11	6.53	22.2	8.84	4.79	239.26	1835.34	53.2	217.98	81.28	33.69	238.73	141.43	58.15	115.62	26.9	0	1	1	0	0	0	3
27	11.58	21.04	0	13.14	0	4.64	1	5.18	15.76	11.45	9.5	11.64	4.19	338.7	1950.5	53.59	318.6	78.52	33.02	180.74	161.32	48.13	110.68	27.81	0	1	0	0	0	1	3
28	9.94	17.53	0	22.16	0	2.45	1	9.21	13.73	9.1	18.6	15.89	5.95	444.22	2250.97	81.79	257.01	68.63	29.44	205.41	138.89	31.31	125.47	24.37	0	1	1	0	0	0	1
29	13.35	17.19	1	21.62	0	2.06	1	3.42	17.38	14.26	21	10.17	4.69	251.26	1852.25	73.21	301.12	106.97	23.56	188.79	122.75	41.35	122.09	30.03	0	1	0	0	0	0	2
30	9.5	19.51	1	28.1	1	3.36	1	4.63	19.59	12.4	27.49	8.71	4.35	320.35	1852.7	71.66	289.91	55.4	38.29	238.76	134.79	30.54	148.41	30.74	0	0	1	0	0	0	1
31	7.53	18.9	1	11.14	0	3.74	0	6.23	12.89	11.19	17.99	7.02	8.42	351.81	2018.78	59.08	253.2	69.32	23.24	189.95	108.34	56.59	136.97	19.59	0	0	1	1	0	0	1
32	12.12	15.88	1	12.58	1	2.02	0	5.54	13.68	11.51	22.27	6.67	5.29	373.63	1825.92	62.97	323.46	106.77	25.44	185.68	143.17	35.76	132.09	25.34	0	0	0	1	0	0	1
33	5.98	17.79	1	16.02	0	3.29	1	4.77	12.08	13.43	15.65	5.35	7.09	293.18	1759.63	82.45	292.24	91.69	25.3	150.44	130.9	23.07	123.43	31.02	0	0	0	1	1	0	1
34	13.05	17.72	1	21.93	0	2.55	1	2.49	5.28	14.69	21.2	10.19	3.1	234.52	1796.63	59.01	267.2	74.71	24.03	228.08	170.94	47.21	125.59	22.83	0	0	0	0	0	0	1
35	8.9	21.37	0	5.61	0	4.41	0	6.98	14.45	6.32	15.44	9.04	4.24	295.22	2031.62	70.1	313.01	44.78	39.3	207.41	93.28	36.32	121.05	28.44	0	0	0	1	0	0	3
36	10.94	16.97	0	14.51	1	3.14	0	4.16	9.18	9.89	12.48	6.38	4.26	351.29	2436.63	79	252.74	108	29.66	183.36	121.79	58.57	117.6	31.63	1	1	0	1	0	0	2
37	8.95	17.21	0	19.08	0	3.74	0	7.03	11.43	4.67	11.08	13.6	7.25	331.93	1827.56	58.93	286.83	85.19	24.93	220.53	144.73	56.44	127.85	22.39	1	0	1	0	0	1	3
38	10.68	21.74	1	16.53	0	3.91	0	6.01	14.89	10.9	19.68	14.46	3.89	374.54	1902.05	68.46	224.72	85.44	43.13	156.65	124.97	67.7	130.82	31.29	0	1	1	0	1	0	2
39	7.84	23.85	1	14.63	1	4.01	0	3.69	11.93	11.71	25.18	8.19	5.67	293.8	2079.45	77.31	292.52	62.14	32.64	163.95	149.72	72.65	115.44	33.6	0	0	0	0	0	0	3
40	9.21	15.83	0	22.22	1	3.5	1	3.23	18.04	11.15	18.93	7.94	3.96	306.46	2114.64	63.23	262.31	73.32	26.33	161.77	142.24	34.49	130.44	31.17	0	1	1	0	0	0	2
41	7.07	16.54	1	11.95	0	3.76	0	3.37	24.04	14.15	19.63	7.31	5.28	257.69	1579.14	65.36	283.75	51.79	29.92	254.3	133.78	42.52	141.53	28.45	0	0	0	1	1	0	1
42	7.41	18.42	0	16.3	0	3.65	1	0.28	15.82	11.61	20.24	3.2	2.94	345.94	1833.41	83.5	218.62	98.61	27.89	200.94	129.52	44.97	152.38	20.63	0	0	0	1	0	0	1
43	9.27	23.81	1	22.89	1	2.87	0	4.21	14.52	9.47	9.87	7.7	5.9	341.86	1679.34	64.51	262.91	79.7	36.81	151.32	133.78	47.59	143.68	29.28	0	1	1	0	0	0	3
44	9.99	20.12	0	16.57	0	2.38	1	3.77	14.43	9.04	11.37	5.84	7.32	266.58	2028.52	73.55	270.12	69.3	40.87	195.54	101.3	36.81	127.36	23.21	0	0	0	1	0	0	3
45	9.86	19.97	0	8.17	0	2.18	1	5.23	9.66	12.18	7.27	8.13	5.19	272.73	2120.73	41.09	353.88	83.29	34.68	182.5	130.84	50.33	133.9	31.2	0	1	0	0	0	0	1
46	6.03	18.69	0	11.86	0	3.46	0	4.05	11.42	13.89	12.9	11.09	7.88	338.06	1679.36	74.66	328.55	93.25	39.04	212.4	129.04	58.14	130.25	25.6	0	0	0	0	0	1	1
47	7.92	15.84	1	22.12	0	4.64	0	3.67	9.31	10.92	18.66	9.26	5.42	396.02	1446.34	94.53	260.65	108.56	36.98	224.44	137.09	68.93	114.49	26.53	0	0	0	0	1	0	3
48	9.16	17.99	0	21.02	0	3.29	0	5.5	11.13	6.83	22.67	6.25	6.31	368.83	1892.02	72.34	261.3	104.44	35.3	179.68	157.41	55.8	128.49	23.43	0	0	0	1	0	0	3
49	8.24	21.48	1	19.37	0	2.86	0	7.35	14.07	9.68	18.01	8.65	5.27	288.18	2303.69	78.53	311.06	85.87	35.71	163.42	130.24	50.29	133.55	27.43	0	0	0	0	0	0	2
50	10.55	14.45	0	20.9	1	2.78	1	7.05	10.54	7.63	24.25	7.19	4.3	451.31	1942.26	46.93	221.9	67.3	26.91	161.29	154.39	53.02	122.39	33.8	0	0	0	0	0	0	3
51	9.52	18.26	1	12.18	1	2.88	1	6.27	13.72	6.86	21.8	2.71	4.01	263.7	2228.96	73.54	252.86	75.79	29.61	206.18	113	55.95	128.65	27.62	1	0	0	0	0	0	3
52	8.5	13.29	1	22.19	1	3.02	1	2.72	17.12	6.59	21.66	8.06	5	440.63	2028.74	54.31	248.92	81.93	35.89	196.58	146.95	58.31	124.96	30.41	0	0	0	1	1	0	3
53	4.62	20.96	0	16.61	1	3.46	1	7.55	8.12	7.38	5.04	10.27	5.17	366.76	2036.02	64.16	287.39	85.99	15.93	180.83	154.98	52.68	115.18	23.74	0	0	0	0	0	0	2
54	10.67	17.3	1	12.27	0	3.73	1	3.55	15.86	9.5	18.7	9.68	6.25	338.02	2153.74	69.81	292.11	93.97	24.28	191.74	102.83	59.87	122.38	32.77	0	1	0	0	0	0	1
55	9.25	15.95	1	30.32	0	3.46	0	6.3	11.54	6.99	25.43	8.04	8.22	350.42	1994.14	67.08	229.35	64.41	28.76	210.55	121.68	57.03	159.07	29.8	1	1	1	0	1	0	3
56	8.09	20.81	1	22.13	0	2.49	1	1.33	18.97	11.36	14.56	7.17	7.64	340.35	2437.51	80.94	272.9	105.04	46.95	186.43	89.77	44.36	123.01	30.86	0	1	1	0	0	1	3
57	9.88	17.73	1	12.66	0	2.66	1	1.91	22.9	3.28	14.94	8.03	6.25	271.03	1804.95	50.58	323.11	102.91	28.99	157.45	121.72	38.31	149.35	33.09	0	0	0	0	0	0	3
58	6.95	17.24	0	16.54	1	3.09	1	2.49	11.69	9.12	21.88	9.66	5.32	313.36	1741.96	81.04	228.66	65.75	34.44	186.11	124.24	46.97	135.75	30.85	0	0	0	0	1	0	3
59	7.38	16.04	0	32.03	1	2.9	0	6.29	13.86	8.14	11.49	8.49	7.05	299.71	2093.04	85.57	239.13	85.74	45.56	195.03	137.01	64.63	133.13	26.05	1	0	0	0	0	0	3
